# Supplementary material for: From Suicide to Resilience: The Role of Adaptive Sports in Mental Rehabilitation After Spinal Injury – A Case Study of an Indian Paralympian
Source: Research Square preprint supplement (doi:10.21203/rs.3.rs-7158841/v1), 2025-11-01
Supplement: Supplementary file 1 [file ce0acaddba25f7cd0d0d14f4.docx]

**Electronic Supplementary Table 7: Weekly Schedule of Physical Rehabilitation, Archery Practice, and Psychosocial Training for a Wheelchair Paralympian**

| **Day** | **Session** | **Warm-up (15 min)** | **Strength/Conditioning (30-45 min)** | **Cooling Down (5-10 min)** | **Game-Specific Exercises (10 min)** | **Game Practice**  **2 Hours** | **PST / CBT / Recreation (30-60 min)** |
| --- | --- | --- | --- | --- | --- | --- | --- |
| Monday | Morning | Arm circles, wrist rolls, shoulder mobility drills | Strength training: rows, presses, band pulls | Neck stretches, breathing exercises | Anchor drills, bow hold, target focus | Technical drills, scoring rounds | Concentration, Behavioral Reconstruction, Goal Setting |
| Monday | Evening | Dynamic trunk rotations, band pulls | Core control: med ball throws, planks | Relaxation poses | Release and focus drills | Simulated match sessions | Recreational Activities |
| Tuesday | Morning | Light cardio, upper limb stretches | Resistance training in gym | Cooling with stretches and breathing | Draw a simulation, posture alignment | Skill work, scoring exercises | Motivation class, focus training |
| Tuesday | Evening | Mobility drills, postural alignment | Tratak yoga, balance training | Mindful breathing | Consistency and visualization | Routine gameplay + meditation | Tratak Yoga, Recreational game |
| Wednesday | Morning | Basic joint mobility, shoulder rolls | Circuit training routine | Light stretching routine | Shooting form + anchor | Standard archery set | Meditation and Mindfulness |
| Wednesday | Evening | Dynamic warm-up for archery | Recreational game warm-up | Recreational recovery | Form correction | Target drills + gameplay | Recreational activities with peers |
| Thursday | Morning | Upper limb mobility, band exercises | Concurrent training: strength + endurance | Stretching + breath control | Stance, grip + release | Structured gameplay | PST, Goal Setting, Behavioral training, |
| Thursday | Evening | Trunk mobility and seated stretches | Mindfulness yoga, mobility work | Meditative wind-down | Breathing and hold drills | Match simulation | Meditation + Recreational games |
| Friday | Morning | Dynamic stretching, light mobility | Resistance + weight training | Stretching + 10 min rest | Shooting warm-up | Free shooting + practice | PST lecture (30 min), |
| Friday | Evening | Game-specific dynamic stretches | Recreational warm-up | None | Shooting rhythm + grip | Practice sets | Recreational games |
| Saturday | Morning | Joint warm-up, seated rotations | Circuit training | Cooling + stretching | Form and anchor lock-ins | Game drills | PST, mindfulness + yoga, |
| Saturday | Evening | Archery posture drills, warm-up sets | Mobility yoga + balance exercises | Stretch-down routine | Hold and release drill | Intermural Competition between Peers | Goal setting + Tactical Training |
| Sunday | Evening | None | None | None | Imagery training | None | Imagery, meditation, and concentration |

**Note:** This weekly schedule is sustained throughout the year during regular training periods. However, during intensive sports camps or coaching sessions conducted by external institutions, such as the Sports Authority of India, training routines may vary depending on institutional guidelines and program objectives.
